# Supplementary material for: Genome-wide identification of soybean microRNA responsive to soybean cyst nematodes infection by deep sequencing
Source: PubMed Central journal article supplement (PMC5541722; doi:10.1186/s12864-017-3963-4), 2017-08-02

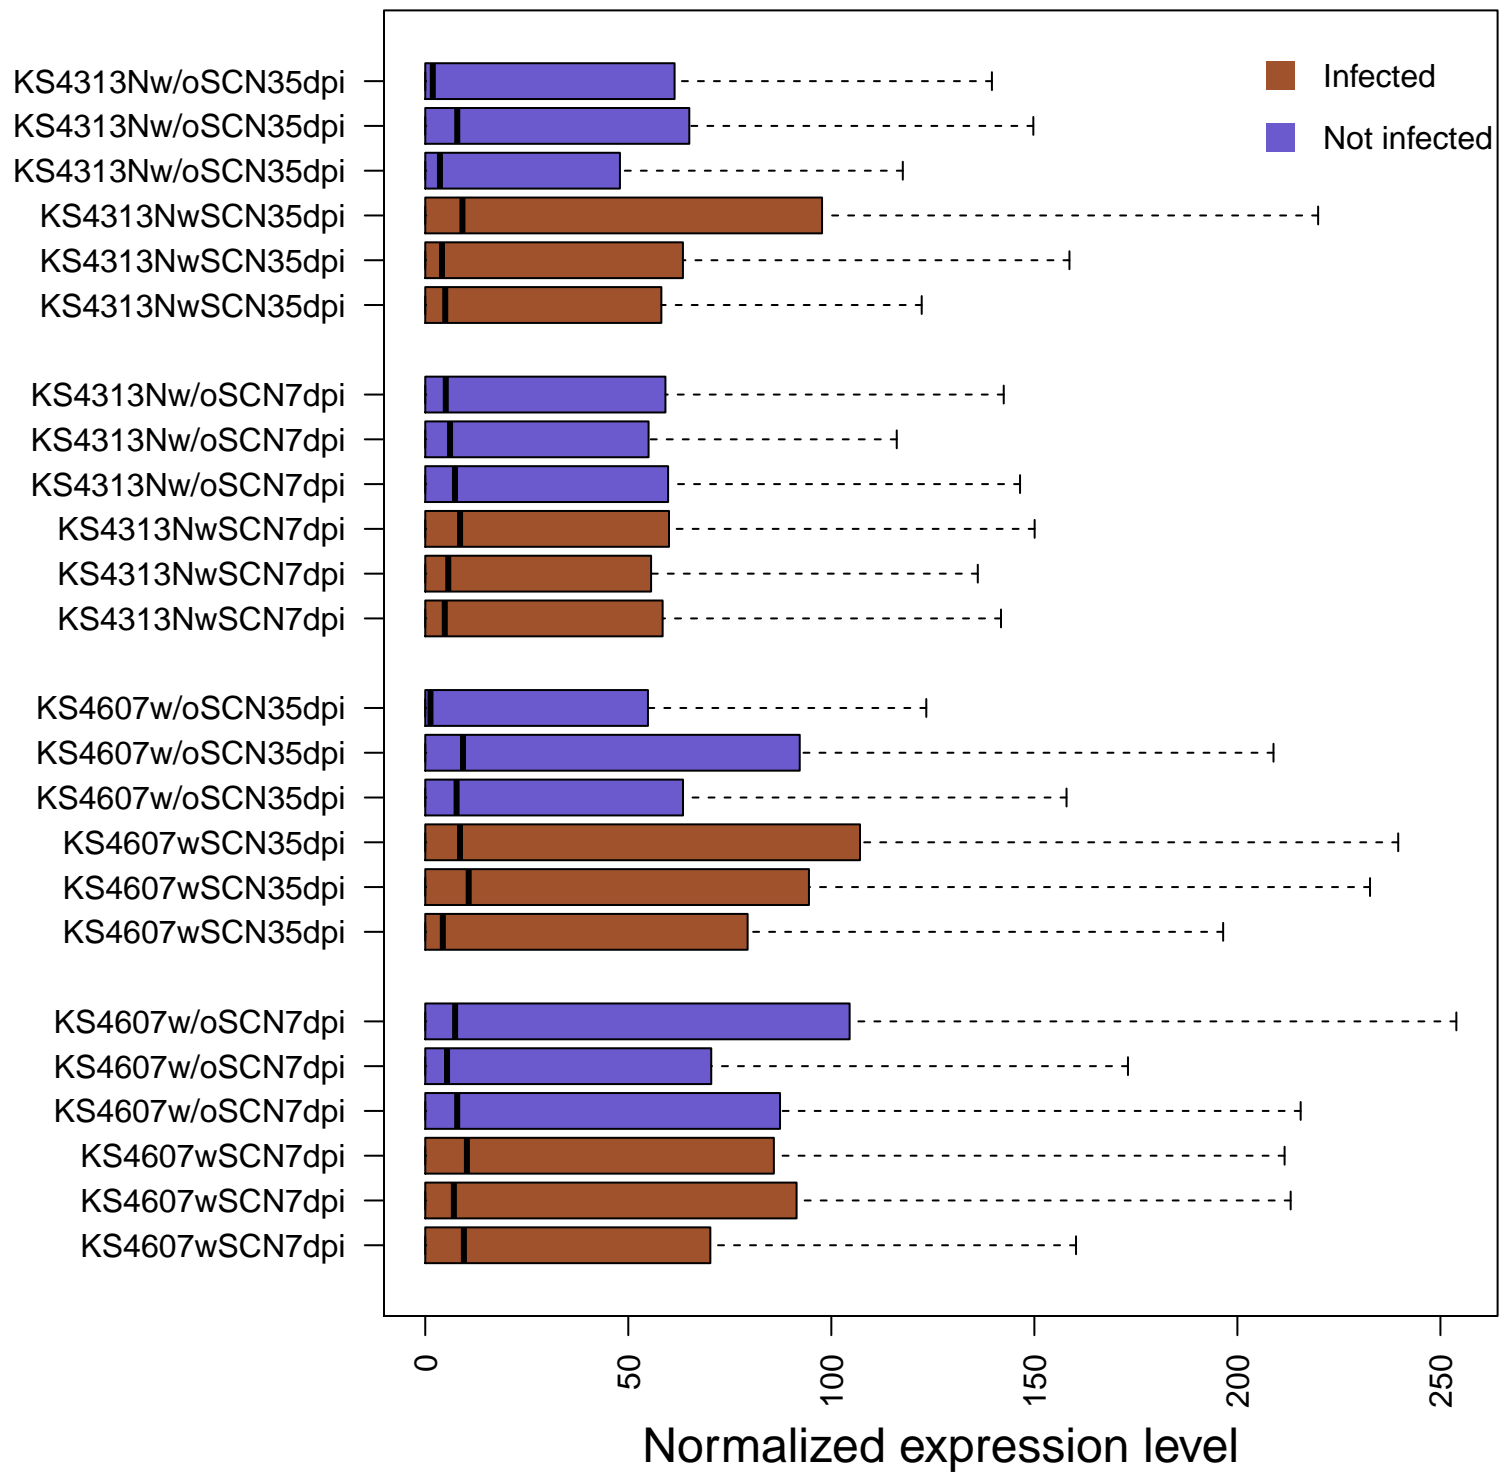

Supplement: 12864_2017_3963_MOESM5_ESM.pdf [file 12864_2017_3963_MOESM5_ESM.pdf]
